# Supplementary material
Source: MDPI journal article supplement (https://www.mdpi.com/2073-4352/9/8/377)
Supplement: s1 [file s1]

# Zeolite-Assisted Shear Exfoliation of Graphite into Few-Layer Graphene

Gabriela Tubon Usca, Cristian Vacacela Gomez, Marco Guevara, Talia Tene, Jorge Hernandez, Raul Molina, Adalgisa Tavolaro, Domenico Miriello and Lorenzo S. Caputi

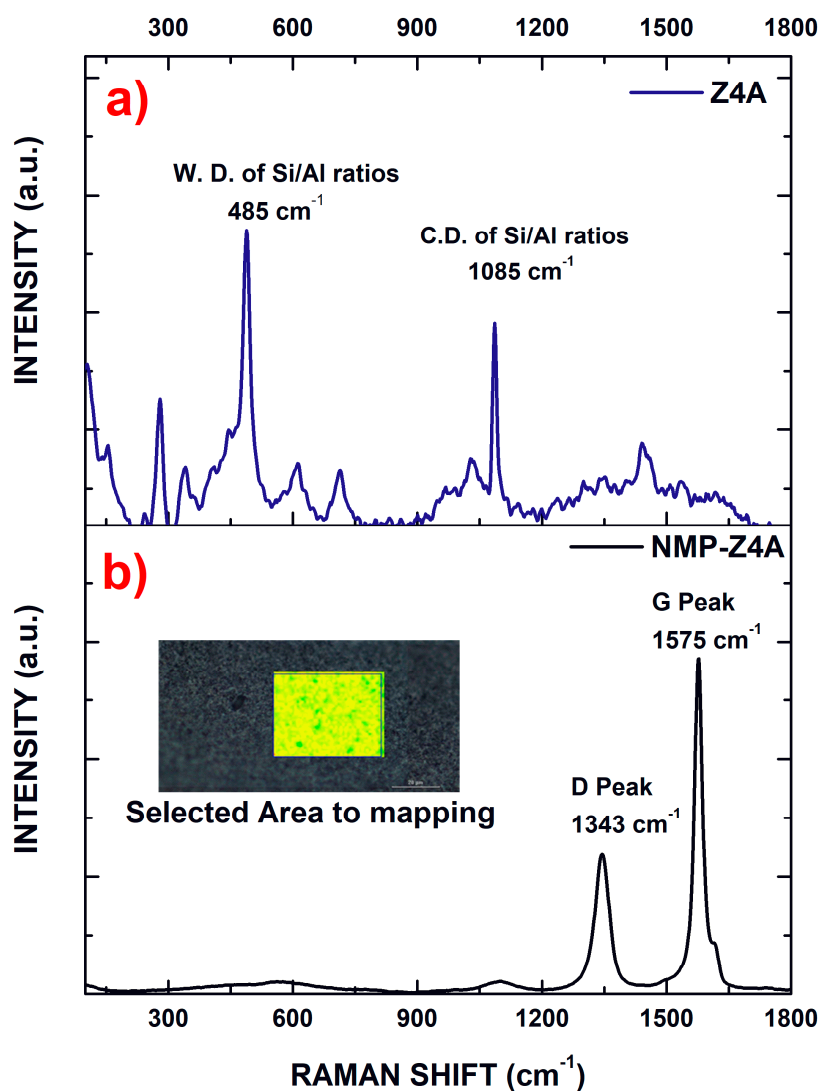

**Figure S1.** Raman spectrum of (a) zeolite 4A (Z4A) and (b) graphene dispersed in NMP+Z4A after centrifugation for 10 min at 1000 rpm. (Inset) Sampled region.
